# Supplementary material for: Selection and Optimization of an Innovative Polysaccharide-Based Carrier to Improve Anthocyanins Stability in Purple Corn Cob Extracts
Source: MDPI journal article supplement (doi:10.3390/antiox11050916), 2022-05-06
Supplement: s1 [file s1]

**Supplementary Table S1.** Coded levels and real values for EMCP extraction process and yield results. Runs were reported following their standard order.

| Run | Coded level (real value)                    |                       | Extraction yield (%) |
|-----|---------------------------------------------|-----------------------|----------------------|
|     | X <sub>1</sub> (Ca <sup>2+</sup> loading %) | X <sub>2</sub> (Time) |                      |
| 1   | -1 (1.2)                                    | -1 (5.0)              | 0.82                 |
| 2   | -1 (1.2)                                    | +1 (12.0)             | 0.83                 |
| 3   | +1 (4)                                      | -1 (5.0)              | 3.81                 |
| 4   | +1 (4)                                      | +1 (12.0)             | 3.28                 |
| 5   | -1.414 (0.6)                                | 0 (9.0)               | 0.68                 |
| 6   | +1.414 (4.6)                                | 0 (9.0)               | 4.80                 |
| 7   | 0 (2.6)                                     | -1.414 (4.0)          | 1.78                 |
| 8   | 0 (2.6)                                     | +1.414 (14.0)         | 1.86                 |
| 9   | 0 (2.6)                                     | 0 9.0                 | 2.32                 |
| 10  | 0 (2.6)                                     | 0 9.0                 | 2.57                 |
| 11  | 0 (2.6)                                     | 0 9.0                 | 2.60                 |

**Supplementary Table S2.** Coded levels and real values for CCP extraction process and yield results. Runs were reported following their standard order.

| Run | Coded level (real value)        |                         | Extraction yield (%) |
|-----|---------------------------------|-------------------------|----------------------|
|     | X <sub>1</sub> (Temperature °C) | X <sub>2</sub> : (Time) |                      |
| 1   | -1 (90)                         | -1 (5)                  | 9.16                 |
| 2   | -1 (90)                         | +1 (15)                 | 7.27                 |
| 3   | +1 (115)                        | -1 (5)                  | 15.30                |
| 4   | +1 (115)                        | +1 (15)                 | 15.85                |
| 5   | -1.414 (84.822)                 | 0 (10)                  | 5.29                 |
| 6   | +1.414 (120.177)                | 0 (10)                  | 16.19                |
| 7   | 0 (102.5)                       | + 1.414 (2.982)         | 8.73                 |
| 8   | 0 (102.5)                       | -1.414 (17.071)         | 12.89                |
| 9   | 0 (102.5)                       | 0 (10)                  | 12.63                |
| 10  | 0 (102.5)                       | 0 (10)                  | 12.84                |
| 11  | 0 (102.5)                       | 0 (10)                  | 12.85                |

**Supplementary Table S3.** Coded levels and real values for CBP extraction process and yields results. Runs were reported following their standard order.

| Run | Coded levels (real values)      |                       |                                           | Extraction yields (%) |
|-----|---------------------------------|-----------------------|-------------------------------------------|-----------------------|
|     | X <sub>1</sub> (Temperature °C) | X <sub>2</sub> (time) | X <sub>3</sub> (solvent/raw material L/g) |                       |
| 1   | -1 (30)                         | -1 (30)               | -1 (5)                                    | 13.53                 |
| 2   | -1 (30)                         | -1 (30)               | +1 (10)                                   | 14.21                 |
| 3   | -1 (30)                         | +1 (120)              | -1 (5)                                    | 13.49                 |
| 4   | -1 (30)                         | +1 (120)              | + 1 (10)                                  | 18.51                 |
| 5   | +1 (60)                         | -1 (30)               | -1 (5)                                    | 9.02                  |
| 6   | +1 (60)                         | -1 (30)               | +1 (10)                                   | 14.43                 |
| 7   | +1 (60)                         | +1 (120)              | -1 (5)                                    | 10.43                 |
| 8   | +1 (60)                         | +1 (120)              | +1 (10)                                   | 17.67                 |
| 9   | -1.682 (19.7)                   | 0 (75)                | 0 (7.5)                                   | 12.86                 |
| 10  | +1.682 (70.226)                 | 0 (75)                | 0 (7.5)                                   | 13.46                 |
| 11  | 0 (45)                          | -1.682 (0)            | 0 (7.5)                                   | 0                     |
| 12  | 0 (45)                          | +1.682 (150)          | 0 (7.5)                                   | 12.82                 |
| 13  | 0 (45)                          | 0 (75)                | -1.682 (3.3)                              | 3.71                  |
| 14  | 0 (45)                          | 0 (75)                | +1.682 (11.7)                             | 16.15                 |
| 15  | 0 (45)                          | 0 (75)                | 0 (7.5)                                   | 10.85                 |
| 16  | 0 (45)                          | 0 (75)                | 0 (7.5)                                   | 10.40                 |
| 17  | 0 (45)                          | 0 (75)                | 0 (7.5)                                   | 10.68                 |

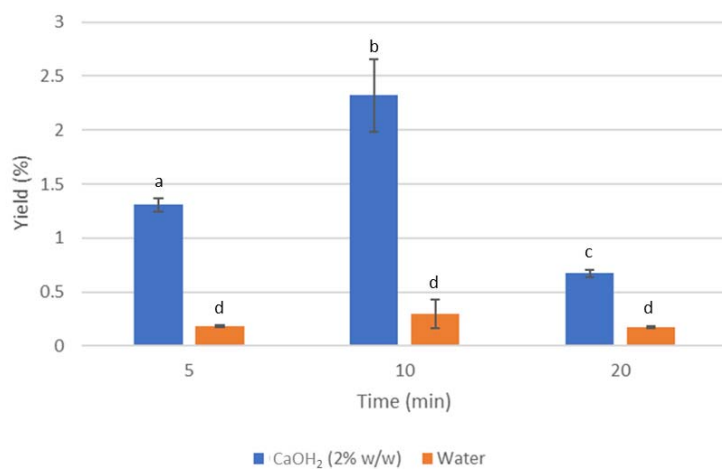

**Figure S1.** EMCP extraction yields. They were obtained using 10:1 solvent (water or 2% Ca(OH)<sub>2</sub> solution) to raw material ratio, at 120 °C, after 5, 10, and 20 min. Different capital letters indicate significant differences ( $p = 0.05$ ).

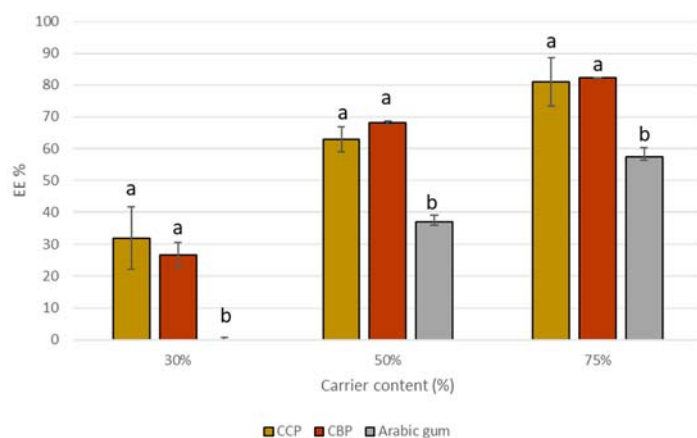

**Figure S2.** Encapsulation efficiency (EE%) registered for MCE-CCP and MCE-CBP ingredients obtained using 30, 50, and 75% (w/w) of polysaccharide carrier. Arabic gum (30, 50, and 75% (w/w)) was used as reference carrier. Different capital letters indicated significant differences between ingredients with the same core/carrier ratio ( $p = 0.05$ ).

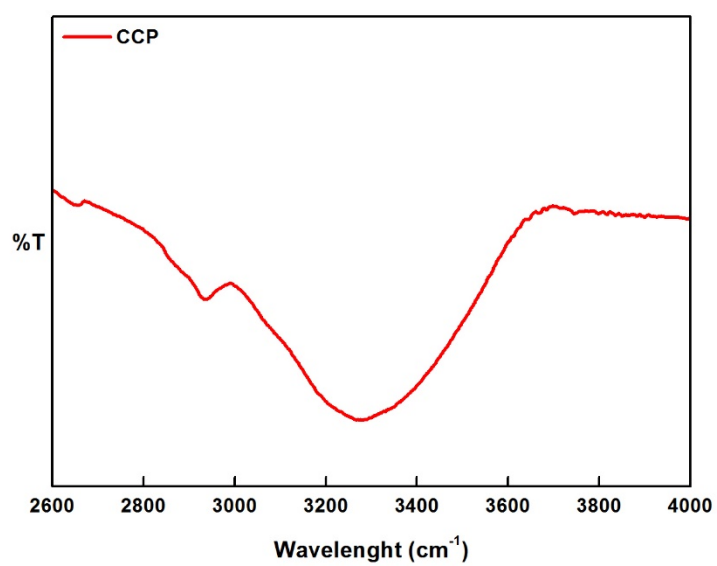

**Figure S3.** –OH stretching of CCP centered at 3,275 cm<sup>-1</sup>.

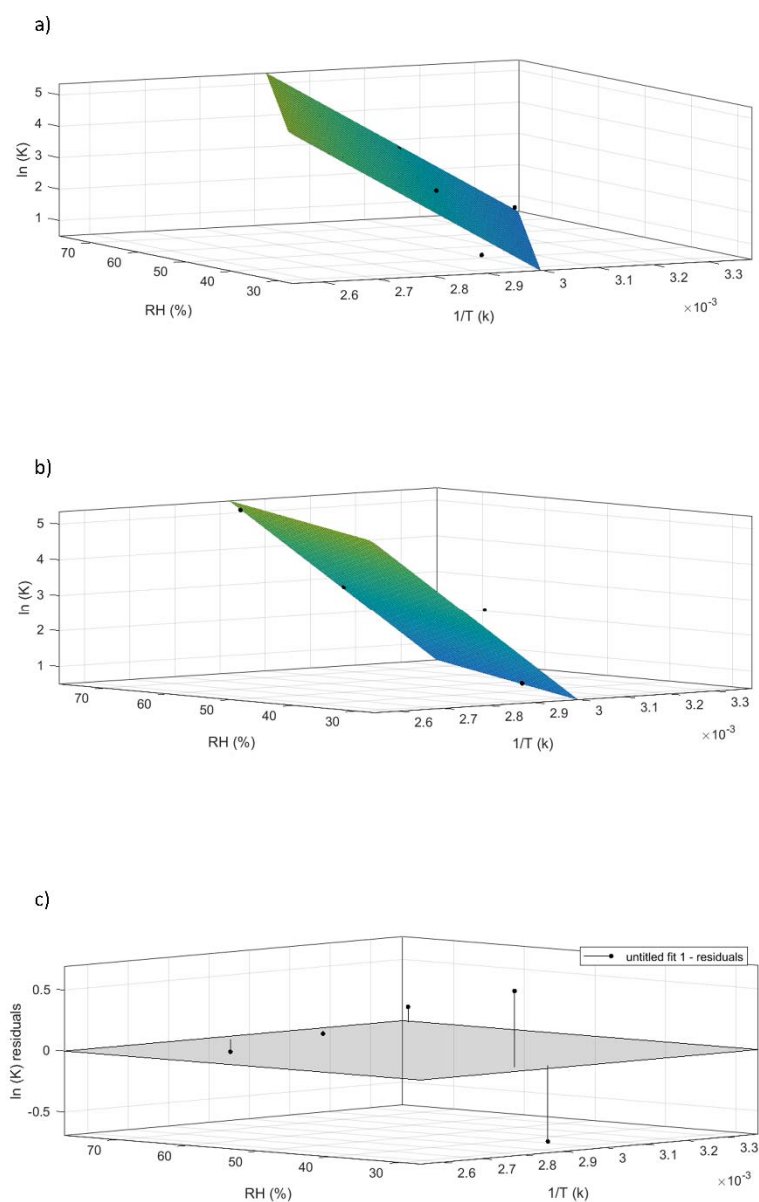

**Figure S4.** Multilinear regression model for MCE-CCP (50/50) ingredient. a) and b) Different perspectives of a three-dimensional surface plot of the model generated by the Matlab curve-fitting tool for MCE-CCP (50/50) ingredient. c) The residual plot generated using the same tool ( $p = 0.05$ ).

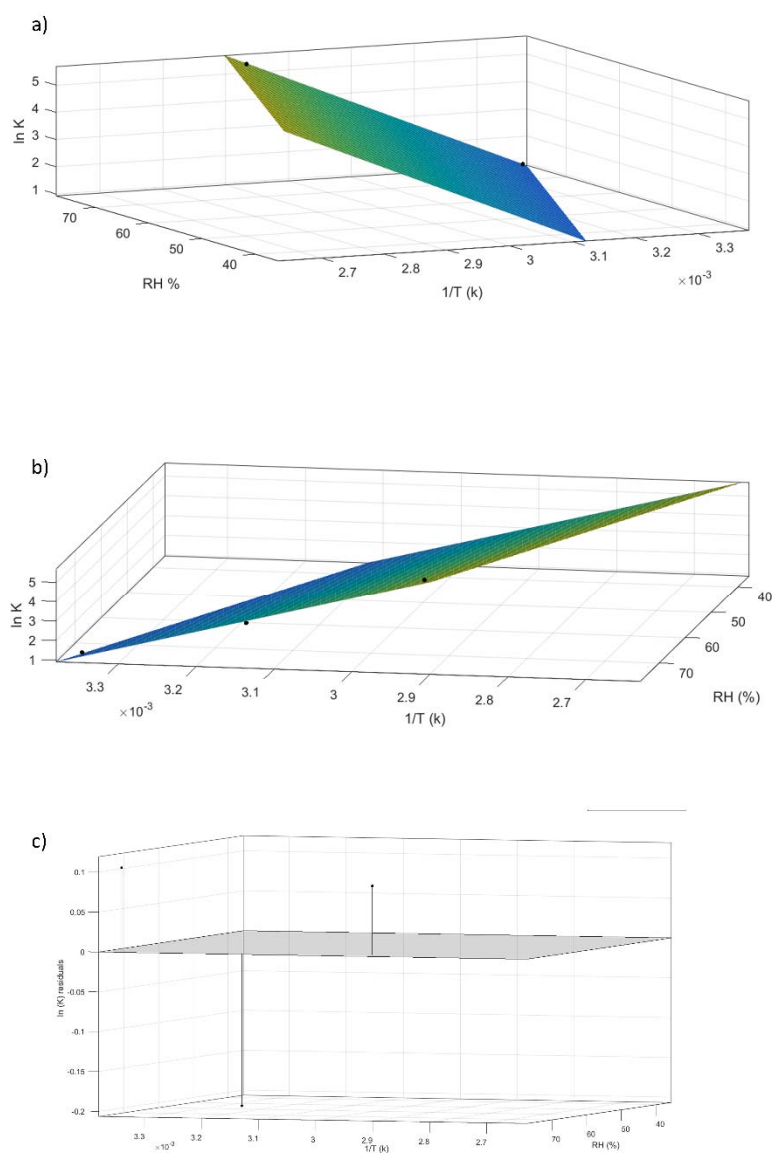

**Figure S5.** Multilinear ASAP model for MCE-CCP (25/75) ingredient. a) and b) Different perspectives of a three-dimensional surface plot of the model generated by the Matlab curve-fitting tool for MCE-CCP (25/75) ingredient. c) The residual plot generated using the same tool ( $p=0.05$ ).

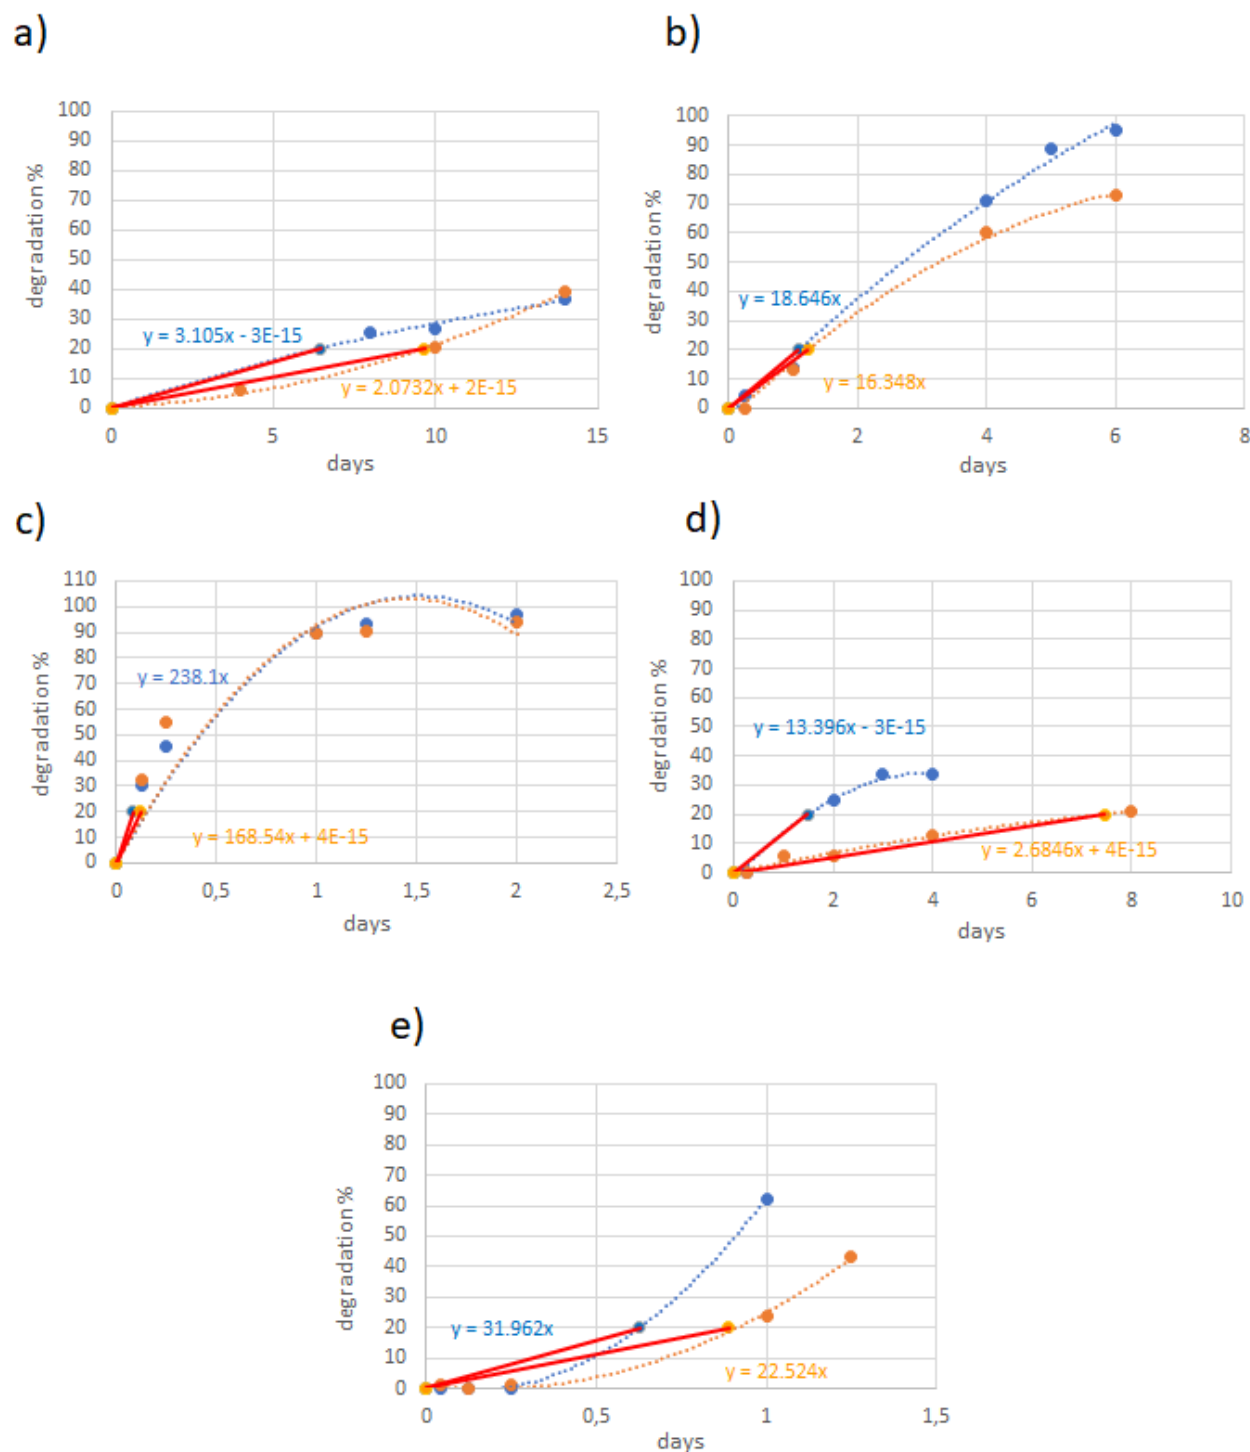

**Figure S6.** Kinetic graphs of C3G degradation in MCE-CCP (50/50) (blue) and MCE-CCP (25/75) (orange) ingredients when exposed to a) 25 °C - 75% RH, b) 45 °C - 75% RH, c) 70 °C - 75% RH, d) 70 °C - 30% RH, and e) 80 °C - 30% RH. Degradation rates were extrapolated from the slope of the straight line (red line) going from the origin to the point corresponding to the specification limit of degradation.
